# Supplementary material for: Association between Interferon-Lambda-3 rs12979860, TLL1 rs17047200 and DDR1 rs4618569 Variant Polymorphisms with the Course and Outcome of SARS-CoV-2 Patients
Source: MDPI journal article supplement (doi:10.3390/genes12060830), 2021-05-28
Supplement: s1 [file s1]

**Supplementary Table 1. Demographic and laboratory characters of Covid-19 cases according to genotype distribution:**

|                                                                                        | SNP1 (rs12979860)                   |                                          |                                           | SNP 2 (rs17047200)                     |                                       |                                      | SNP 3 (rs4618569)                      |                                        |                                    | Test of significance                                                                                       |
|----------------------------------------------------------------------------------------|-------------------------------------|------------------------------------------|-------------------------------------------|----------------------------------------|---------------------------------------|--------------------------------------|----------------------------------------|----------------------------------------|------------------------------------|------------------------------------------------------------------------------------------------------------|
|                                                                                        | TT<br><i>n</i> = 19                 | TC<br><i>n</i> = 59                      | CC<br><i>n</i> = 63                       | AA<br><i>n</i> = 94                    | TA<br><i>n</i> = 37                   | TT<br><i>n</i> = 10                  | AA<br><i>n</i> = 66                    | AG<br><i>n</i> = 56                    | GG<br><i>n</i> = 19                |                                                                                                            |
| Sex<br>Male 85(60.3%)<br>Female 56 (39.7%)                                             | 12(63.2%)<br>7(36.8%)               | 36(61%)<br>23(39%)                       | 37(58.7%)<br>26(41.3%)                    | 55(58.5%)<br>39 (41.5%)                | 22(59.5%)<br>15(%)                    | 8(80%)<br>2(20%)                     | 44(66.7%)<br>22 (33.3%)                | 29(51.8%)<br>27 (48.2%)                | 12(63.2%)<br>7 (36.8%)             | X <sup>2</sup> =.142,<br>P1=.931<br>X <sup>2</sup> =1.758,<br>P2=.415<br>X <sup>2</sup> =2.878,<br>P3=.237 |
| Comorbidities<br>+ve<br>81(57.4%)<br><br>-ve 60(42.6%)                                 | 14(73.7%)<br>5(26.3%)               | 31(52.5%)<br>28(47.5%)                   | 36(57.1%)<br>27(42.9%)                    | 54(57.4%)<br>40(42.6%)                 | 20(54.1%)<br>17(45.9%)                | 7(70%)<br>3(30%)                     | 31(47%)<br>35 (53%)                    | 37(66.1%)<br>19(33.9%)                 | 13(68.4%)<br>6(31.6%)              | X <sup>2</sup> =2.632,<br>P1=.268<br>X <sup>2</sup> =.819,<br>P2=.664<br>X <sup>2</sup> =5.604,<br>P3=.061 |
| Severity<br>Mild( <i>n</i> = 82)<br>Severe( <i>n</i> = 11)<br>Critical( <i>n</i> = 84) | 9 (47.4%)<br><br>0(0%)<br>9 (10.7%) | 32 (54.2%)<br><br>3 (27.2% )<br>32 (38%) | 41 (65.1%)<br><br>8 (72.8%)<br>43 (57.1%) | 58 (61.7%)<br><br>0 (0%)<br>60 (71.4%) | 21 (56.8%)<br><br>2(9.2%)<br>21 (25%) | 3(30%)<br><br>0(0%)<br>7 (8.3%)<br>0 | 46(69.7%)<br><br>9(81.8%)<br>48(57.1%) | 22(39.3%)<br><br>2(17.8%)<br>34(40.5%) | 14(73.7%)<br><br>0(0%)<br>5(5.09%) | X <sup>2</sup> =2.522,<br>P1=.283<br>X <sup>2</sup> =3.773,<br>P2=.152<br>X <sup>2</sup> =13.689,          |

|                                                                                                |                                              |                                          |                                           |                                            |                                           |                            |                                                 |                                                |                                               |                                                                                                               |
|------------------------------------------------------------------------------------------------|----------------------------------------------|------------------------------------------|-------------------------------------------|--------------------------------------------|-------------------------------------------|----------------------------|-------------------------------------------------|------------------------------------------------|-----------------------------------------------|---------------------------------------------------------------------------------------------------------------|
|                                                                                                |                                              |                                          |                                           |                                            |                                           |                            |                                                 |                                                |                                               | P3=.001*                                                                                                      |
| Ventilation<br>+ve <b>54 (38.3%)</b><br>-ve <b>87 (61.7%)</b>                                  | 9<br>(47.4%)<br>10(52.6<br>%)                | 24<br>(40.7%)<br>35<br>(59.3%)           | 21<br>(33.3%)<br>42(66.7%<br>)            | 31 (33%)<br>63 (67%)                       | 16<br>(43.2%)<br>21<br>(56.8%)            | 7 (70%)<br>3 (30%)         | 17(25.8<br>%)<br>49(74.2<br>%)                  | 32<br>(57.1%)<br>24(42.9<br>%)                 | 5<br>(26.3%)<br>14<br>(73.7%)                 | X <sup>2</sup> =1.460,<br>P1=.482<br>X <sup>2</sup> =5.761,<br>P2=.056<br>X <sup>2</sup> =13.963,<br>P3=.001* |
| Outcome<br>Recovery <b>63 (44.7%)</b><br>Recurrence <b>30 (21.3%)</b><br>Death <b>48 (34%)</b> | 5(26.3<br>%)<br>6(31.6<br>%)<br>8(42.1<br>%) | 27(45.8<br>%)<br>9(15.3%<br>)<br>23(39%) | 31(49.2%<br>)<br>15(23.8%<br>)<br>17(27%) | 47 (50%)<br>18(19.1%<br>)<br>29(30.9%<br>) | 13(35.1%<br>)<br>10(27%)<br>14(37.8%<br>) | 3(30%)<br>2(20%)<br>5(50%) | 33(50%<br>)<br>17(25.8.<br>3%)<br>16(24.2<br>%) | 20(35.7<br>%)<br>7<br>(12.5%)<br>29(51.8<br>%) | 10(52.6<br>%)<br>6(31.6<br>%)<br>3(15.8<br>%) | X <sup>2</sup> =5.590,<br>P1=.232<br>X <sup>2</sup> =3.801,<br>P2=.434<br>X <sup>2</sup> =14.193,<br>P3=.007* |
| Age/years                                                                                      | 35±14.8                                      | 37.5±21.<br>2                            | 38±21.5                                   | 35.2±21.9                                  | 41.5±18.2                                 | 42.9±9.<br>7               | 39.1±20<br>.5                                   | 35.5±20.<br>5                                  | 36.9±20<br>.8                                 | F1=.159,<br>P1=.853<br>F2=1.640,<br>P2=.198<br>F3=.457,<br>P3=.634                                            |

|                                            |              |          |          |           |           |              |                |                |                |                                                                        |
|--------------------------------------------|--------------|----------|----------|-----------|-----------|--------------|----------------|----------------|----------------|------------------------------------------------------------------------|
| <b>TLC<br/>(thousands/cm<br/>m)</b>        | 72.16        | 69.64    | 71.92    | 66.7      | 79.59     | 79.65        | 67.65          | 74.79          | 71.47          | Kw1=.113,<br>P1=.945<br>Kw2=3.143,<br>P2=.208<br>Kw3=.931,<br>P3=.628  |
| <b>Ferritin(ng/mL<br/>)</b>                | 72.74        | 68.78    | 72.56    | 70.74     | 67.70     | 85.60        | 69.38          | 72.58          | 71.97          | Kw1=.301,<br>P1=.860<br>Kw2=1.526,<br>P2=.466<br>Kw3=.199,<br>P3=.905  |
| <b>Lymphocytes<br/>(x10<sup>9</sup>/L)</b> | 61.71        | 74.47    | 70.55    | 76.01     | 60.07     | 64.40        | 72.42          | 70.50          | 67.55          | Kw1=1.429,<br>P1=.490<br>Kw2=4.357,<br>P2=.113<br>Kw3=.255,<br>P3=.894 |
| <b>Haemoglobin<br/>(g/dL)</b>              | 12.4±2.<br>2 | 12.2±2.1 | 11.8±1.9 | 12.2±2.05 | 11.7±2.07 | 12.1±2.<br>3 | 12.05±2<br>.05 | 11.99±2.<br>16 | 12.54±1<br>.91 | F1=.776,<br>P1=.462<br>F2=.668,<br>P2=.514<br>F3=.535,<br>P3=.587      |

|                                      |                |                |                |                |                |                |                 |                |        |                                                                         |
|--------------------------------------|----------------|----------------|----------------|----------------|----------------|----------------|-----------------|----------------|--------|-------------------------------------------------------------------------|
| <b>PLTs<br/>(thousands/cm<br/>m)</b> | 269.3±5<br>5.5 | 256.2±6<br>7.5 | 261.3±92.<br>1 | 260.4±86.<br>7 | 249.6±55.<br>9 | 299.1±4<br>3.4 | 258.25±<br>77.7 | 266.5±7<br>5.6 | 249±87 | F1=.209,<br>P1=.812<br>F2=1.604,<br>P2=.205<br>F3=401,<br>P3=.671       |
| <b>C-reactive<br/>protein (mg/L)</b> | 68.13          | 66.81          | 75.79          | 64.23          | 82.77          | 91.1           | 69.84           | 72.46          | 70.71  | Kw1=,1.582<br>P1=.453<br>Kw2=8.097,<br>P2=.017*<br>Kw3=.126,<br>P3=.939 |
| <b>Serum LDH<br/>(U/L)</b>           | 73.13          | 65.55          | 75.46          | 67.51          | 78.42          | 76.40          | 75.95           | 64.05          | 74.29  | Kw1=1.859,<br>P1=.395<br>Kw2=2.090,<br>P2=.352<br>Kw3=2.719,<br>P3=.257 |
| <b>D-dimer(mg/L)</b>                 | 75.34          | 71.31          | 69.40          | 69.85          | 76.23          | 69.06          | 68.41           | 74.35          | 70.13  | Kw1=.319,<br>P1=.853<br>Kw2=.838,<br>P2=.658<br>Kw3=.660,<br>P3=.719    |

P1: difference between TT, TC&CC, P2: difference between TT, AT&AA, P3: difference between AA, AG&GG KW $\chi^2$ : Kruskal Wallis test, F: One Way ANOVA test,  $\chi^2$ : Chi-Square test, Parameters described as mean $\pm$  SD for parametric values & mean rank for non-parametric values. \*statistically significant

**Supplementary Table 2. Correlation between the frequencies of polymorphisms, severity and mortality rates of Covid-19 cases (Spearman's rho):**

[illegible]

|                                                              |                         |       |        |       |         |       |       |         |         |         |         |        |
|--------------------------------------------------------------|-------------------------|-------|--------|-------|---------|-------|-------|---------|---------|---------|---------|--------|
| rs1704720<br>0_TT                                            | Correlation Coefficient | .053  | .046   | -.082 | -.391** | -.165 | 1.000 | -.038   | .058    | -.028   | .158    | .095   |
|                                                              | Sig. (2-tailed)         | .534  | .591   | .336  | .000    | .051  | .     | .657    | .494    | .741    | .062    | .260   |
|                                                              | N                       | 141   | 141    | 141   | 141     | 141   | 141   | 141     | 141     | 141     | 141     | 141    |
| rs4618569<br>_AA                                             | Correlation Coefficient | -.120 | .097   | -.014 | .060    | -.043 | -.038 | 1.000   | -.761** | -.370** | -.219** | -.156  |
|                                                              | Sig. (2-tailed)         | .155  | .250   | .869  | .478    | .616  | .657  | .       | .000    | .000    | .009    | .064   |
|                                                              | N                       | 141   | 141    | 141   | 141     | 141   | 141   | 141     | 141     | 141     | 141     | 141    |
| rs4618569<br>_AG                                             | Correlation Coefficient | .147  | -.189* | .087  | -.041   | .010  | .058  | -.761** | 1.000   | -.320** | .310**  | .238** |
|                                                              | Sig. (2-tailed)         | .083  | .025   | .306  | .629    | .906  | .494  | .000    | .       | .000    | .000    | .004   |
|                                                              | N                       | 141   | 141    | 141   | 141     | 141   | 141   | 141     | 141     | 141     | 141     | 141    |
| rs4618569<br>_GG                                             | Correlation Coefficient | -.034 | .128   | -.104 | -.029   | .048  | -.028 | -.370** | -.320** | 1.000   | -.124   | -.113  |
|                                                              | Sig. (2-tailed)         | .688  | .129   | .220  | .730    | .573  | .741  | .000    | .000    | .       | .142    | .182   |
|                                                              | N                       | 141   | 141    | 141   | 141     | 141   | 141   | 141     | 141     | 141     | 141     | 141    |
| Severity                                                     | Correlation Coefficient | .086  | .067   | -.126 | -.102   | .017  | .158  | -.219** | .310**  | -.124   | 1.000   | .828** |
|                                                              | Sig. (2-tailed)         | .309  | .427   | .136  | .230    | .842  | .062  | .009    | .000    | .142    | .       | .000   |
|                                                              | N                       | 141   | 141    | 141   | 141     | 141   | 141   | 141     | 141     | 141     | 141     | 141    |
| Outcome                                                      | Correlation Coefficient | .122  | .032   | -.116 | -.139   | .093  | .095  | -.156   | .238**  | -.113   | .828**  | 1.000  |
|                                                              | Sig. (2-tailed)         | .149  | .707   | .173  | .100    | .270  | .260  | .064    | .004    | .182    | .000    | .      |
|                                                              | N                       | 141   | 141    | 141   | 141     | 141   | 141   | 141     | 141     | 141     | 141     | 141    |
| **. Correlation is significant at the 0.01 level (2-tailed). |                         |       |        |       |         |       |       |         |         |         |         |        |
| *. Correlation is significant at the 0.05 level (2-tailed).  |                         |       |        |       |         |       |       |         |         |         |         |        |
